# Supplementary material for: Functional characterization of antennae-enriched chemosensory protein 4 in emerald ash borer, Agrilus planipennis
Source: PeerJ. 2025 Aug 18;13:e19812. doi: 10.7717/peerj.19812 (PMC12369603; doi:10.7717/peerj.19812)
Supplement: Supplemental Information 1 [file peerj-13-19812-s001.xlsx]

## Sheet: Sheet1
	Competitive binding capability(%)
Concentration(μM)	cis-3-Hexenyl benzoate			Hexyl Butyrate			Octane			Decane			Dodecane			Myrcene			Ocimene			β-Ionone			Farnesene			(+)-Limonene			Nerolidol
0	100	100	100	100	100	100	100	100	100	100	100	100	100	100	100	100	100	100	100	100	100	100	100	100	100	100	100	100	100	100	100	100	100
2	76.0983	79.0652	72.7217	93.0948	93.4207	91.053	85.975	86.2111	85.0437	57.1172	60.8138	70.0208	63.066	62.371	59.0946	93.3593	93.6207	95.326	93.4067	90.0634	92.7212	75.7514	74.4951	75.2037	38.2454	32.8312	32.2825	97.2535	97.4709	95.8953	49.2194	51.463	50.752
4	61.8205	62.6633	59.3339	85.3944	84.76	83.3555	67.8943	71.3083	70.0543	45.8027	45.6655	49.8433	37.5162	40.5144	36.3519	86.9977	85.4868	89.2675	88.4911	81.8854	85.2152	61.1785	60.2358	60.8061	27.7423	20.0216	23.9034	90.8935	90.3604	88.2267	35.2978	34.5446	32.1031
6	51.7183	52.3441	49.0753	78.8399	77.5021	75.6266	56.3822	57.8901	54.2819	42.401	42.3979	46.6766	29.7113	30.0968	29.949	75.3312	76.2875	80.8277	82.5386	75.7215	76.2043	51.879	50.2199	51.0303	26.1216	19.0626	22.5711	83.0381	84.401	80.748	25.6268	25.4151	25.0577
8	44.5069	45.5407	42.369	72.2442	71.3681	69.2316	45.027	46.7227	42.7241	40.4062	41.2683	43.4013	27.4466	26.7121	28.4784	66.8953	67.6403	72.2022	75.2984	68.1994	63.8599	45.0239	42.8154	43.7153	24.1125	18.028	21.6132	77.7418	78.3215	71.3561	21.0566	20.9595	20.5391
10	39.2329	38.572	36.9717	65.8421	65.618	62.7841	38.2041	38.967	35.7057	39.9202	39.2004	42.0377	26.735	26.2641	27.4122	61.084	61.2276	66.6056	69.6898	60.3453	57.9099	38.5169	37.3498	38.224	23.6011	17.8361	21.3139	70.6734	71.72	63.3296	17.9138	17.6278	17.3179
12	34.9944	34.5851	32.8537	61.6745	61.0388	57.6483	31.4027	32.7961	31.347	38.2362	38.5773	39.0548	25.8049	25.5826	26.3545	54.8978	55.297	60.7518	63.4481	55.0655	52.0519	34.5875	33.5198	33.2165	22.7333	17.7528	20.1952	65.4243	64.4472	56.5332	16.1061	15.4258	15.6099
