# Supplementary material for: Functional characterization of antennae-enriched chemosensory protein 4 in emerald ash borer, Agrilus planipennis
Source: PeerJ. 2025 Aug 18;13:e19812. doi: 10.7717/peerj.19812 (PMC12369603; doi:10.7717/peerj.19812)
Supplement: Supplemental Information 3 [file peerj-13-19812-s003.xlsx]

## Sheet: Sheet1
Samples	AplaCSP4	EF-1α	β-actin
FA	15.8954	23.357	19.8831
FA	15.6962	23.3189	19.3984
FA	15.8287	23.3318	19.5394
MA	16.9044	23.2338	19.7741
MA	16.7174	23.1618	19.8403
MA	16.872	23.2678	20.0084
Note: The values represent the mean of three technical replicates for each biological replicate.
