# Supplementary material for: Functional characterization of antennae-enriched chemosensory protein 4 in emerald ash borer, Agrilus planipennis
Source: PeerJ. 2025 Aug 18;13:e19812. doi: 10.7717/peerj.19812 (PMC12369603; doi:10.7717/peerj.19812)
Supplement: Supplemental Information 4 [file peerj-13-19812-s004.xls]

## Sheet: Sheet1
ITEM TO CHECK	IMPORTANCE	CHECKLIST
EXPERIMENTAL DESIGN
Definition of experimental and control groups	E	page 6 line 145
Number within each group	E	page 6 line 147
Assay carried out by core lab or investigator's lab?	D
Acknowledgement of authors' contributions	D
SAMPLE
Description	E	page 4 line 90
Volume/mass of sample processed	D	page 4 line 91
Microdissection or macrodissection	E	page 4 line 92
Processing procedure	E	page 4 line92-94
If frozen - how and how quickly?	E	page 4 line93
If fixed - with what, how quickly?	E	page 4 line93
Sample storage conditions and duration (especially for FFPE samples)	E	page 4 line93
NUCLEIC ACID EXTRACTION
Procedure and/or instrumentation	E	page 4 line 93-94
Name of kit and details of any modifications	E	page 4 line93
Source of additional reagents used	D	page 4 line93
Details of DNase or RNAse treatment	E	page 4 line 96-98
Contamination assessment (DNA or RNA)	E	page 4 line 96-98
Nucleic acid quantification	E	page 4 line 96-98
Instrument and method	E	page 4 line 96-98
Purity (A260/A280)	D	page 4 line 96-98
Yield	D	page 4 line 96-98
RNA integrity method/instrument	E	page 4 line 94-96
RIN/RQI or Cq of 3' and 5' transcripts	E	page 4 line 94-96
Electrophoresis traces	D
Inhibition testing (Cq dilutions, spike or other)	E	page 5 line120
REVERSE TRANSCRIPTION
Complete reaction conditions	E	page 4 line 94-98
Amount of RNA and reaction volume	E	page 4 line 97
Priming oligonucleotide (if using GSP) and concentration	E	page 4 line 98
Reverse transcriptase and concentration	E	page 4 line 98
Temperature and time	E	page 4 line 98
Manufacturer of reagents and catalogue numbers	D
Cqs with and without RT	D*
Storage conditions of cDNA	D
qPCR TARGET INFORMATION
If multiplex, efficiency and LOD of each assay.	E	page 5 and 6 line 133-150
Sequence accession number	E	page 4 line 103
Location of amplicon	D
Amplicon length	E	page 6 line 142
In silico specificity screen (BLAST, etc)	E	page 6 141 and 142
Pseudogenes, retropseudogenes or other homologs?	D
Sequence alignment	D
Secondary structure analysis of amplicon	D
Location of each primer by exon or intron (if applicable)	E	page 6 line 144
What splice variants are targeted?	E	page 6 line 144
qPCR OLIGONUCLEOTIDES
Primer sequences	E	page 6 line 144
RTPrimerDB Identification Number	D
Probe sequences	D**
Location and identity of any modifications	E	page 6 line 144
Manufacturer of oligonucleotides	D
Purification method	D
qPCR PROTOCOL
Complete reaction conditions	E	page 5-6 line 133-150
Reaction volume and amount of cDNA/DNA	E	page 5 line 136
Primer, (probe), Mg++ and dNTP concentrations	E	page 6 line 144
Polymerase identity and concentration	E	page 5 135-136
Buffer/kit identity and manufacturer	E	page 5 and 135-138
Exact chemical constitution of the buffer	D
Additives (SYBR Green I, DMSO, etc.)	E	page 5 135-136
Manufacturer of plates/tubes and catalog number	D	page 5 135-136
Complete thermocycling parameters	E	page 5 135-136
Reaction setup (manual/robotic)	D
Manufacturer of qPCR instrument	E	page 5 135-136
qPCR VALIDATION
Evidence of optimisation (from gradients)	D
Specificity (gel, sequence, melt, or digest)	E	page 6 line 144-146
For SYBR Green I, Cq of the NTC	E	page 5 135-136
Standard curves with slope and y-intercept	E	page 6 line 144-146
PCR efficiency calculated from slope	E	page 6 line 144-146
Confidence interval for PCR efficiency or standard error	D
r2 of standard curve	E	page 6 line 144-146
Linear dynamic range	E	page 6 line 144-146
Cq variation at lower limit	E	page 6 line 144-146
Confidence intervals throughout range	D
Evidence for limit of detection	E	page 6 line 144-146
If multiplex, efficiency and LOD of each assay.	E	page 6 line 144-146
DATA ANALYSIS
qPCR analysis program (source, version)	E	page 6 line 146-148
Cq method determination	E	page 6 line 146-148
Outlier identification and disposition	E	page 6 line 146-148
Results of NTCs	E	page 6 line 146-148
Justification of number and choice of reference genes	E	page 6 line 146-148
Description of normalisation method	E	page 6 line 146-148
Number and concordance of biological replicates	D
Number and stage (RT or qPCR) of technical replicates	E	page 6 line 140-141
Repeatability (intra-assay variation)	E
Reproducibility (inter-assay variation, %CV)	D
Power analysis	D
Statistical methods for result significance	E	page 6 line 147-150
Software (source, version)	E	page 6 line 147-150
Cq or raw data submission using RDML	D
Table 1. MIQE checklist for authors, reviewers and editors. All essential information (E) must be submitted with the manuscript. Desirable
information (D) should be submitted if available. If using primers obtained from RTPrimerDB, information on qPCR target, oligonucleotides,
protocols and validation is available from that source.
*: Assessing the absence of DNA using a no RT assay is essential when first extracting RNA. Once the sample has been validated as
RDNA-free, inclusion of a no-RT control is desirable, but no longer essential.
**: Disclosure of the probe sequence is highly desirable and strongly encouraged. However, since not all commercial pre-designed assay
vendors provide this information, it cannot be an essential requirement. Use of such assays is advised against.
